# Supplementary material
Source: PubMed Central journal article supplement (PMC3810182)
Supplement: NIHMS428916-supplement-etable.pdf [file NIHMS428916-supplement-etable.pdf]

## Supplementary Online Content

Friedman DS, Ko F, Vitale S; et al. Prevalence of nonrefractive visual impairment in US adults and associated risk factors, NHANES 1999-2002 and 2005-2008. *JAMA*. doi:10.1001/jama.2012.85685.

**eTable.** Logistic Regression of Individual Variables Predicting Nonrefractive Visual Impairment

This supplementary material has been provided by the authors to give readers additional information about their work.

## eTable. Logistic Regression of Individual Variables Predicting Nonrefractive Visual Impairment

|                                            | 1999-2002   |             | 2005-2008   |             |
|--------------------------------------------|-------------|-------------|-------------|-------------|
|                                            | Odds Ratio* | 95% CI      | Odds Ratio* | 95% CI      |
| Age (per year)                             | 1.07        | 1.05 - 1.09 | 1.06        | 1.05 - 1.07 |
| <b>Ethnicity</b>                           |             |             |             |             |
| Non-Hispanic White (ref)                   | 1           | 1           | 1           | 1           |
| All non-white                              | 2.13        | 1.50 - 3.01 | 2.03        | 1.51 - 2.72 |
| Non-Hispanic Black                         | 2.19        | 1.45 - 3.31 | 1.98        | 1.43 - 2.75 |
| Mexican-American                           | 1.91        | 1.22 - 3.02 | 2.63        | 1.70 - 4.06 |
| Other                                      | 2.16        | 1.28 - 3.63 | 1.70        | 0.95 - 3.02 |
| <b>Sex</b>                                 |             |             |             |             |
| Male (ref)                                 | 1           | 1           | 1           | 1           |
| Female                                     | 1.16        | 0.84 - 1.60 | 1.14        | 0.89 - 1.45 |
| Poverty (PIR ≤1)                           | 2.89        | 1.85 - 4.50 | 3.30        | 2.38 - 4.57 |
| Education (<HS)                            | 1.92        | 1.37 - 2.71 | 2.90        | 2.22 - 3.78 |
| Access to health care                      | 0.66        | 0.31 - 1.42 | 1.33        | 0.80 - 2.21 |
| Lack of Health Insurance                   | 2.50        | 1.62 - 3.87 | 1.69        | 1.02 - 2.81 |
| <b>Smoking</b>                             |             |             |             |             |
| Never (ref)                                | 1           | 1           | 1           | 1           |
| Former smoker                              | 0.77        | 0.52 - 1.13 | 0.95        | 0.67 - 1.32 |
| Current smoker                             | 0.71        | 0.35 - 1.45 | 1.13        | 0.67 - 1.89 |
| BMI ≥ 30 kg/m <sup>2</sup>                 | 0.78        | 0.52 - 1.17 | 1.13        | 0.90 - 1.43 |
| Central obesity                            | 1.11        | 0.72 - 1.72 | 0.89        | 0.71 - 1.12 |
| Diabetes                                   | 1.65        | 1.16 - 2.34 | 2.26        | 1.54 - 3.34 |
| Duration of diabetes:                      |             |             |             |             |
| Never (ref)                                | 1           | 1           | 1           | 1           |
| <10 years                                  | 1.02        | 0.55 - 1.89 | 1.44        | 0.89 - 2.31 |
| ≥10 years                                  | 2.24        | 1.36 - 3.67 | 3.20        | 1.94 - 5.26 |
| Current insulin use                        | 2.49        | 1.17 - 5.29 | 2.25        | 1.22 - 4.17 |
| Systolic hypertension (≥140 mmHg)          | 1.25        | 0.80 - 1.96 | 0.95        | 0.74 - 1.22 |
| Diastolic hypertension (≥90 mmHg)          | 1.40        | 0.63 - 3.08 | 0.76        | 0.42 - 1.38 |
| High triglycerides (≥200 mg/dL)            | 0.75        | 0.36 - 1.58 | 0.94        | 0.47 - 1.88 |
| Low HDL (<40 mg/dL male, <50 mg/dL female) | 1.12        | 0.73 - 1.71 | 1.31        | 0.98 - 1.74 |
| High LDL (≥160 mg/dL)                      | 1.45        | 0.81 - 2.61 | 1.68        | 0.88 - 2.18 |
| High total cholesterol (≥240 mg/dL)        | 1.00        | 0.65 - 1.53 | 1.00        | 0.71 - 1.41 |

Abbreviations: Ref, reference; PIR, poverty income ratio; HS, high school.

\*Adjusted for age.

All variables (except age) are controlled for age.
